# Supplementary material for: SERS-assisted characterization of cell biomass from biofilm-forming Acinetobacter baumannii strains using chemometric tools
Source: Royal Society of Chemistry journal article supplement (doi:10.1039/d4ra06267a), 2025-01-01
Supplement: d4ra06267a1.pdf [file d4ra06267a1.pdf]

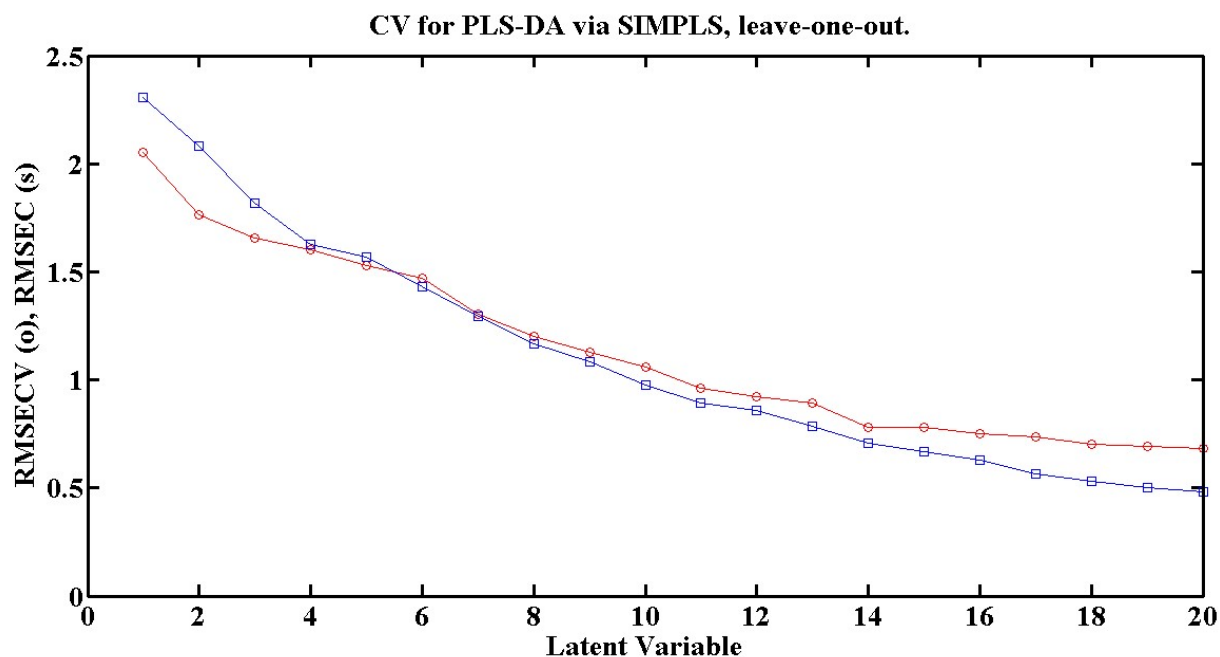

Fig.S1 PLS-DA model for SERS spectral data of non, medium and strong biofilm forming strains of *A. baumannii* for prediction of optimal number of latent variables.

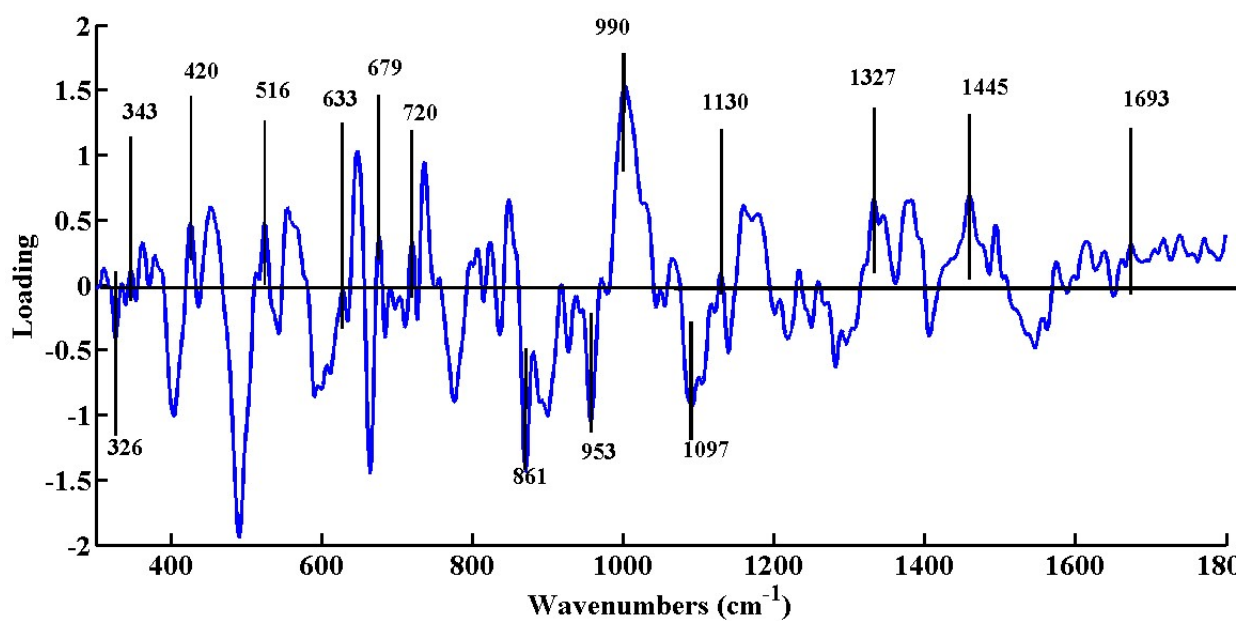

Fig.S2 PLS-DA loading plot of non, medium and strong biofilm forming strains of *A. baumannii*
